# Supplementary material for: Gated MoS2/SiN Nanochannel for Tunable Ion Transport and Protein Translocation
Source: Research Square preprint supplement (doi:10.21203/rs.3.rs-7463511/v1), 2025-09-11

**SUPPLEMENTARY INFORMATION**

**Gated MoS2/SiN Nanochannel for Tunable Ion Transport and Protein Translocation**

Shukun Weng 1,2*; Ali Douaki 1,3; Makusu Tsutsui 4, German Lanzavecchia 1,3, Anastasiia Sapunova 1,2, Lorenzo Iannetti5, Alberto Giacomello5, Roman Krahne 1, and Denis Garoli 1,3*

1 Optoelectronics Research Line, Instituto Italiano di Tecnologia, 16163 Genova, Italy

2 Department of Materials Science, University of Milano-Bicocca, Via R. Cozzi 55, I-20125 Milano, Italy

3 Dipartimento di Scienze e Metodi dell’Ingegneria, Universitàdegli Studi di Modena e Reggio Emilia, Via Amendola, 2, 43122 Reggio Emilia, Italy

4 The Institute of Scientific and Industrial Research, Osaka University, Mihogaoka 8-1, Ibaraki, Osaka, 567-0047, Japan

5 Dipartimento di Ingegneria Meccanica e Aerospaziale, Sapienza Università di Roma, Via Eudossiana, 18, 00184 Roma, Italy


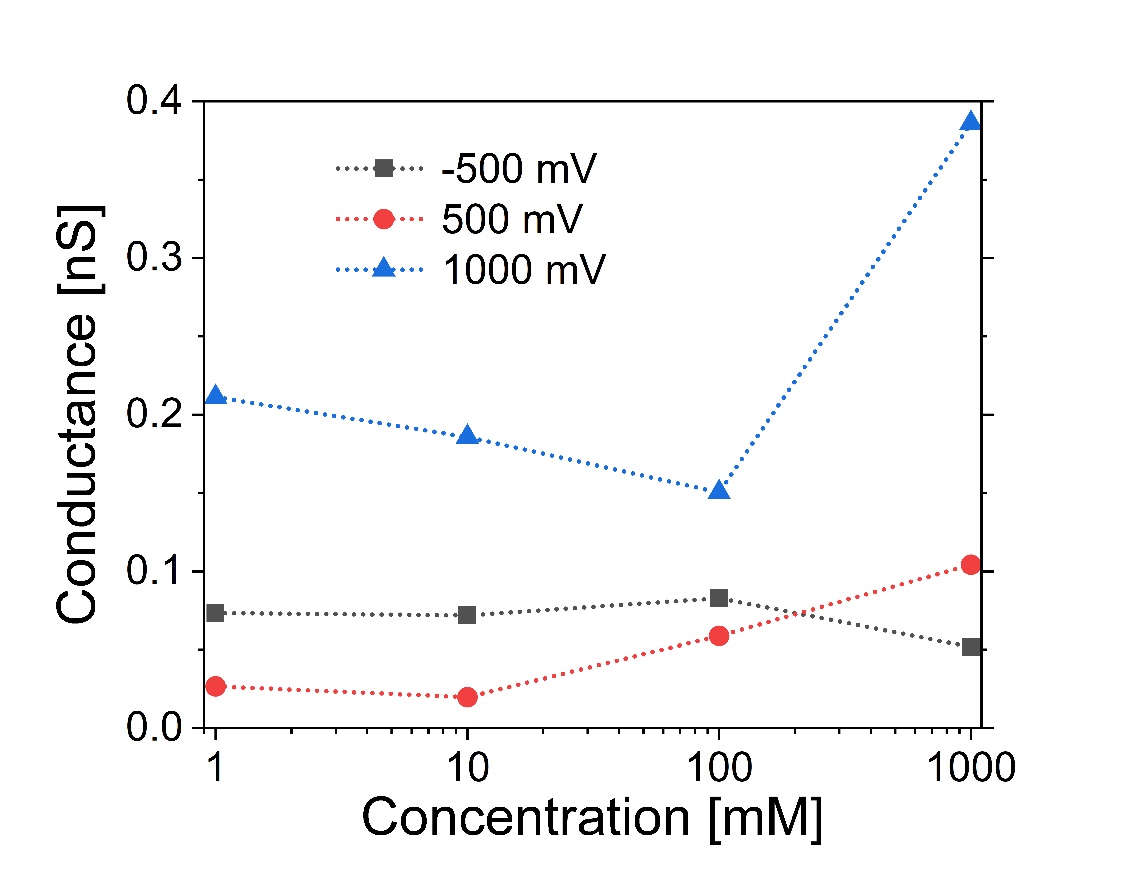
Fig. S1. The conductance of MoS2/SiN nanochannel within different concentration under -500, 500 and 1000 mV potential.

Fig. S2. Ion current traces of low voltage scanning to remove the potential contamination inside the MoS2/SiN channel. (a) 1st to 10th scan; (b) 11th to 268th scan.


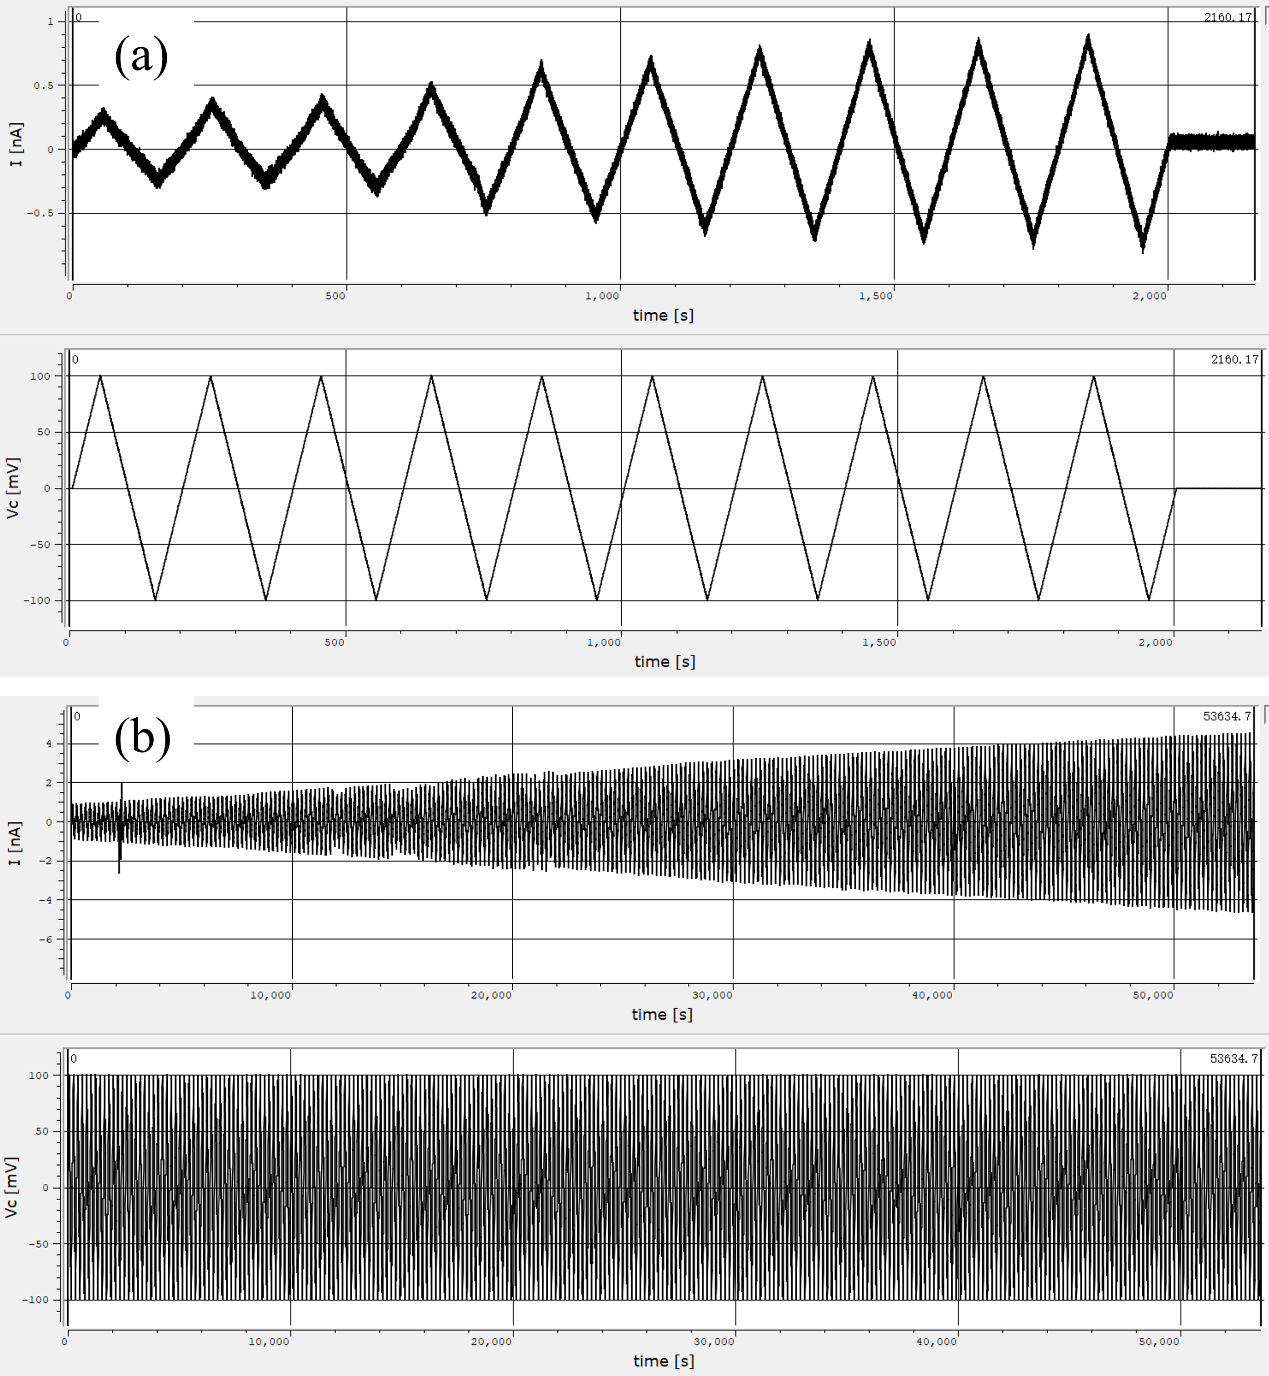


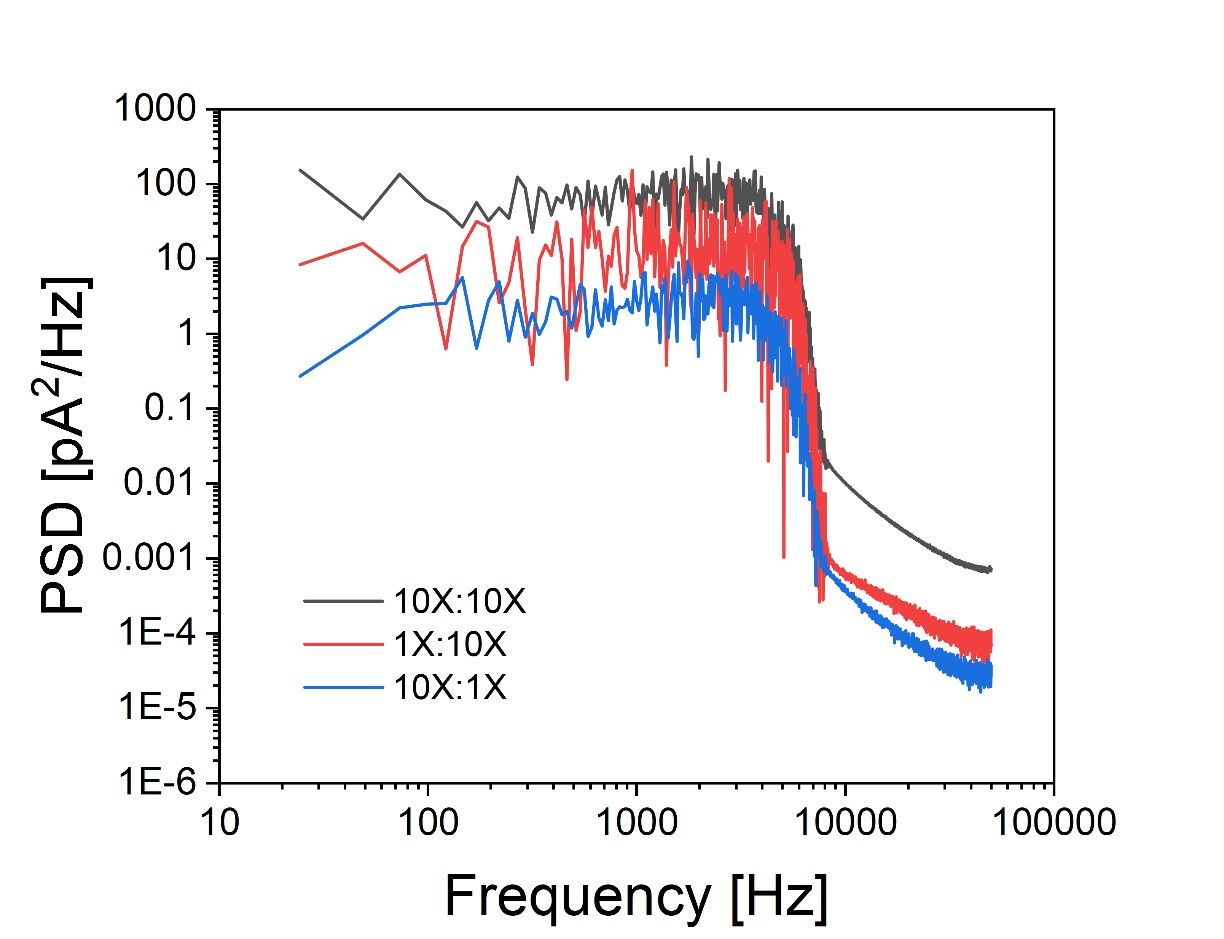
Fig. S3. Power Spectrum Density of nanopore measurement under different electrolyte gradients.


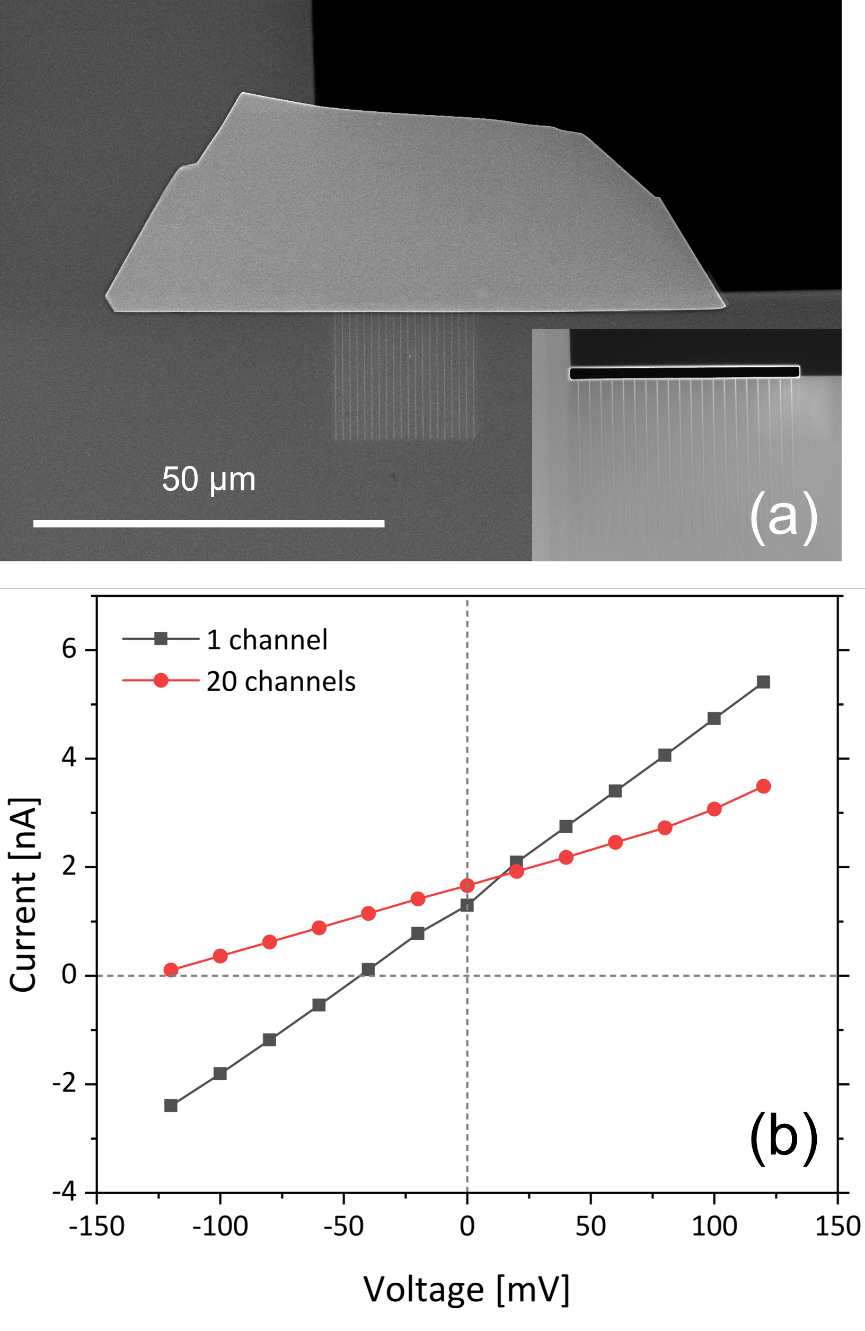
Fig. S4. Scaling of the osmotic power of MoS2/SiN nanochannel.

Fig. S5. BSA translocation events during 2 min recording.


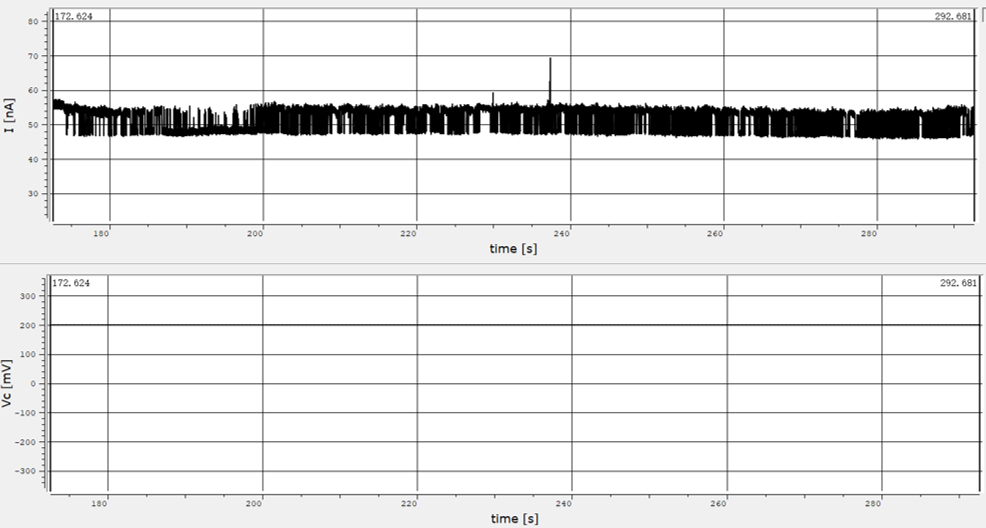

Supplement: Supplementary file 1 [file 3f48710d7504a0be7239d9ae.docx]
